# Supplementary material
Source: PubMed Central journal article supplement (PMC3674325)
Supplement: NIHMS467650-supplement-1.pdf [file NIHMS467650-supplement-1.pdf]

**NMR structure of human restriction factor APOBEC3A reveals substrate binding and enzyme specificity**

In-Ja L Byeon, Jinwoo Ahn, Mithun Mitra, Chang-Hyeock Byeon, Kamil Hercík, Jozef Hritz,  
Lisa M Charlton, Judith G Levin & Angela M Gronenborn

**Supplementary Information**

Supplementary Figures S1-S3, Supplementary Table S1 and Supplementary References

## Supplementary Figures, Tables and References

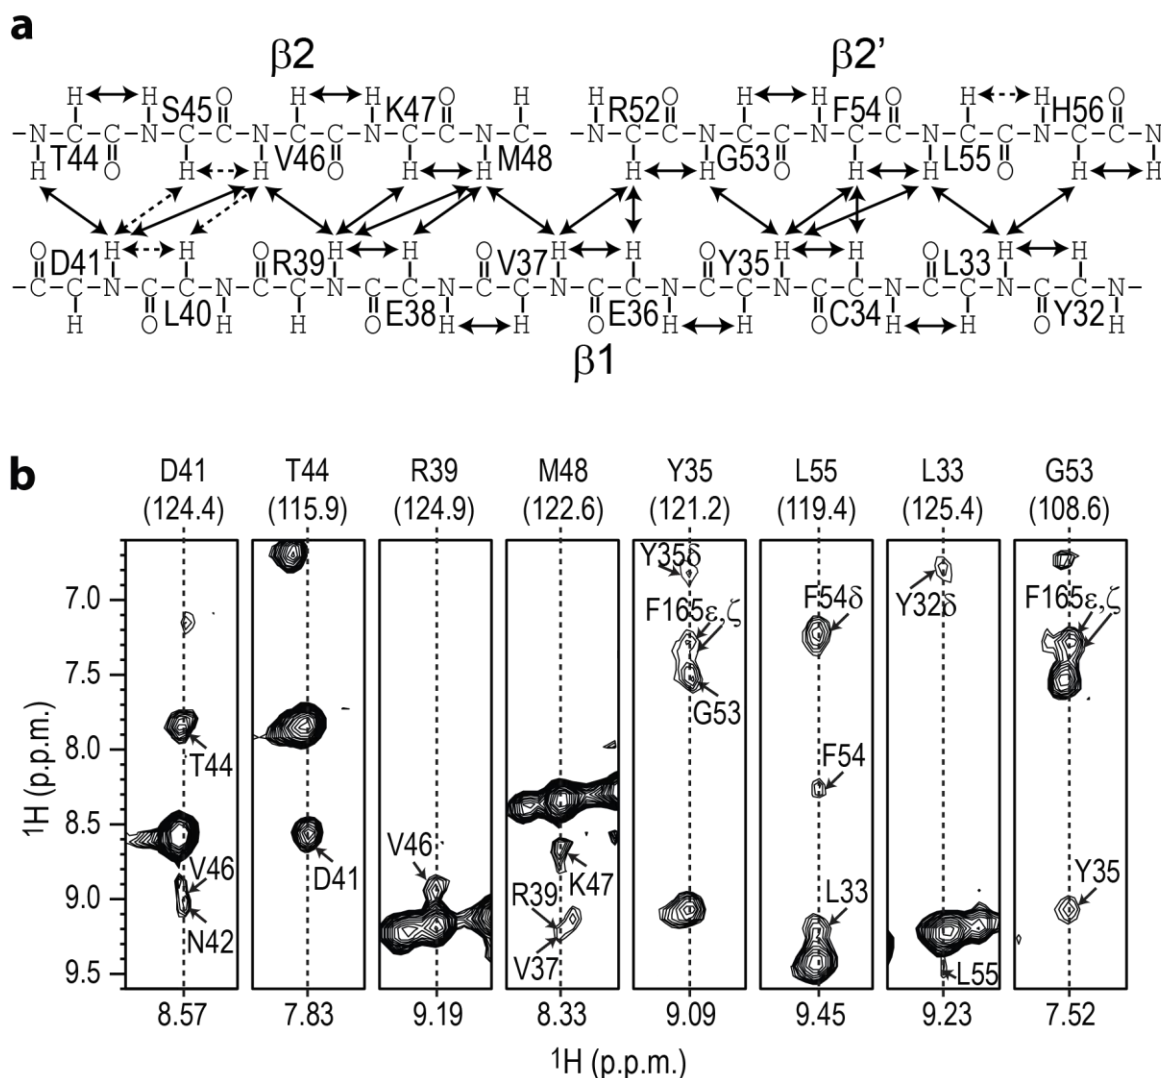

**Supplementary Figure S1.** Observed inter-strand NOEs to identify the  $\beta 2$ -bulge- $\beta 2'$  structure. **(a)** The NOEs that were assigned from 2D NOESY of an unlabeled sample and/or 3D  $^{13}\text{C}$ ,  $^{15}\text{N}$ -edited NOESY data of a variety of isotope-labeled A3A samples (see RESULTS) are marked using double-pointed arrows. The NOEs involving  $\text{H}_\alpha$  resonances whose chemical shifts are very similar to the  $\text{H}_2\text{O}$  signal are shown with dashed arrows. **(b)** Strip plots of selected regions of 3D  $^{15}\text{N}$ -edited NOESY at 900 MHz, 25 °C, were obtained using a 0.17 mM  $^2\text{H}/^{13}\text{C}/^{15}\text{N}$ -labeled protein sample with selective protonations at the side chains of Tyr, Phe and Ile residues (25 mM sodium phosphate, pH 6.5, 200 mM NaCl). The inter-strand HN-HN NOEs are marked by arrows and labeled with residue names. Additional NOEs involving aromatic protons are also labeled. The residue names as well as amide  $^{15}\text{N}$  and  $^1\text{H}$  frequencies (in p.p.m.) are shown at the top and bottom of each strip, respectively.

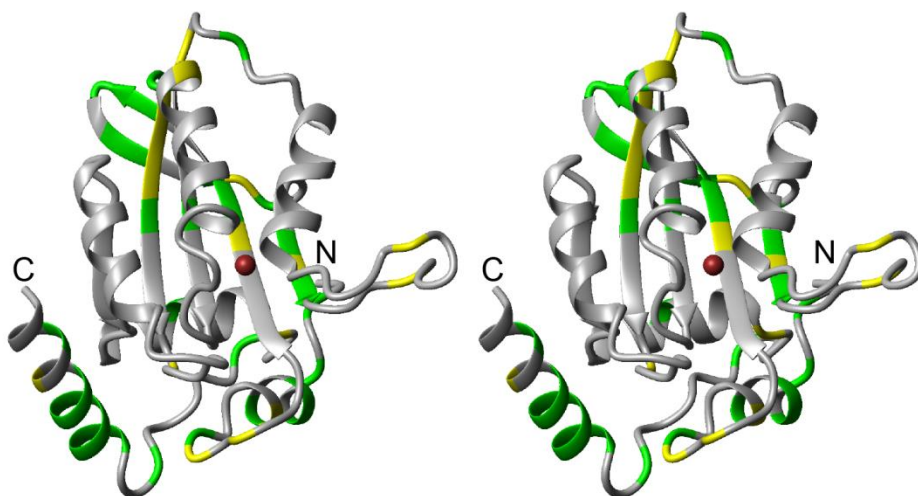

**Supplementary Figure S2.** Non-specific binding sites on A3A upon addition of the 15-nt ssDNA, ATTATTTUATTTATT. Stereo-view of the A3A ribbon structure is shown to locate the non-specific binding sites. The  $^1\text{H}$ ,  $^{15}\text{N}$ -combined chemical shift changes are extracted from the  $^1\text{H}$ - $^{15}\text{N}$  HSQC spectra and calculated using  $\sqrt{\Delta\delta_{HN}^2 + (\Delta\delta_N/6)^2}$ , where  $\Delta\delta_{HN}$  and  $\Delta\delta_N$  are the  $^1\text{HN}$  and  $^{15}\text{N}$  chemical shift differences, respectively, between the A3A samples ( $\sim 0.1\text{mM}$ ) containing low (0.440 mM, where A3A is barely affected by non-specific binding) and high (3.051 mM, where the non-specific binding sites of A3A are significantly affected) DNA concentrations. The resonances that undergo large chemical shift change are shown in green ( $>0.05\text{p.p.m.}$ ) and yellow (0.028-0.050 p.p.m.).

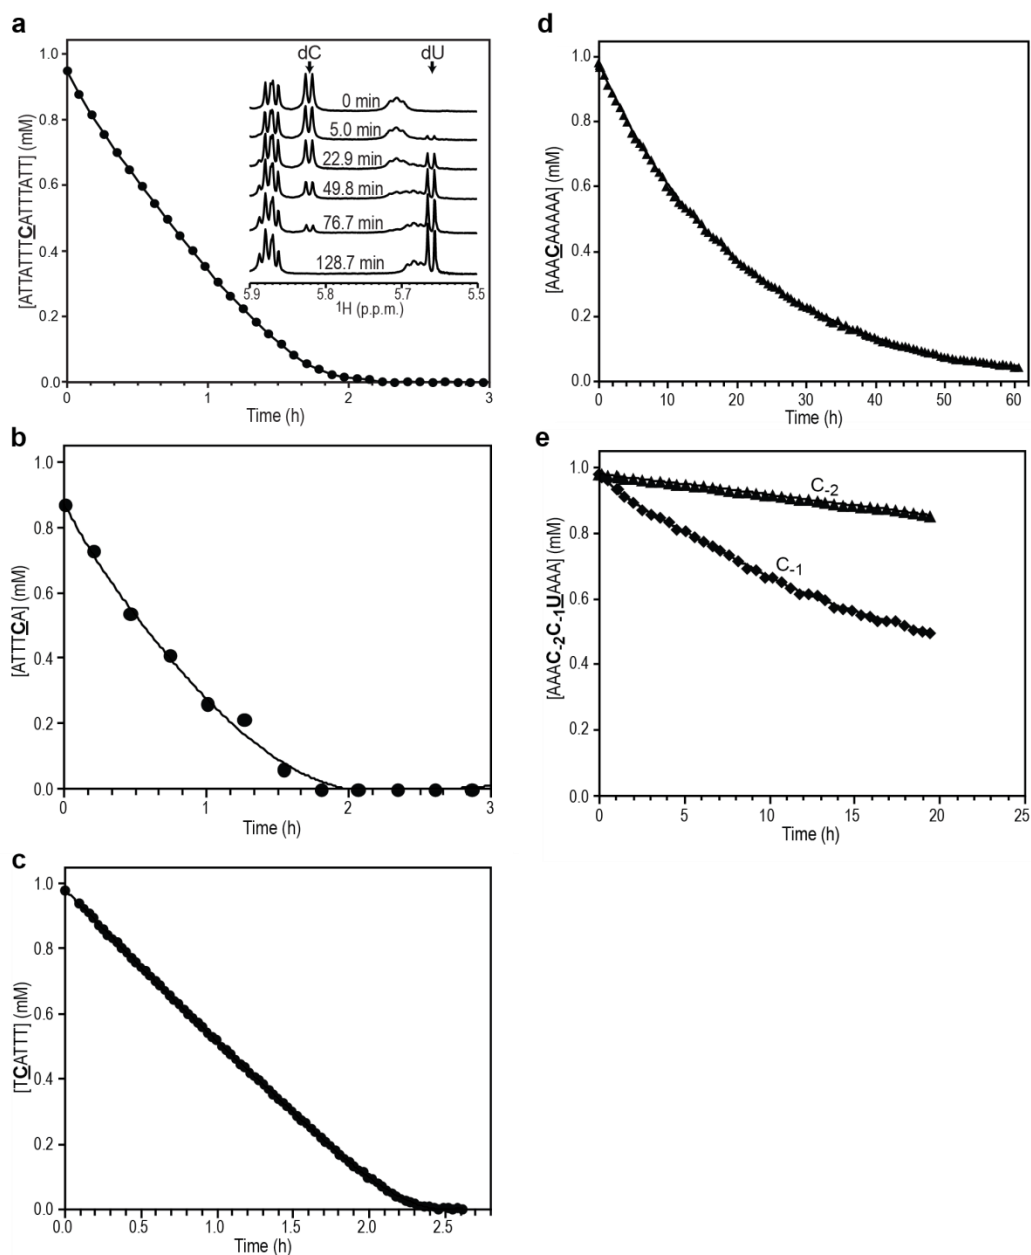

**Supplementary Figure S3.** A plot of the concentration of the unreacted cytidine in substrates 15-nt ATTATTTCATTTATT (**a**), 6-nt ATTCA (**b**), 6-nt TCATTT (**c**), 9-nt AAAACAAAA (**d**), or 9-nt AAAC2C1UAAA (**e**) vs. incubation time. The concentrations of the remaining substrate and end product were measured from the peak intensities of the  $^1\text{H}$ -5 (**a**, **c-d** from 1D) or  $^{13}\text{C}$ -5- $^1\text{H}$  (**b** from 2D) resonances (900 MHz, 25° C) of the cytosine and uracil bases in oligodeoxynucleotides, as a function of time after adding A3A (final concentration, 0.197  $\mu\text{M}$ ) to the ssDNA solutions. Six representative 1D NMR spectra acquired at the indicated times are shown in the **inset** in (**a**).

**Supplementary Table S1.** Structural comparison of APOBEC proteins

| Protein                                                           | PDB ID           | Method<br>(resolution) <sup>a</sup> | Backbone r.m.s.<br>differences (Å) <sup>b</sup> | reference   |
|-------------------------------------------------------------------|------------------|-------------------------------------|-------------------------------------------------|-------------|
| hA3A full-length (1-199)                                          | XXXX             | NMR                                 | 0                                               | This study  |
| hA3G-CTD (191-384) 2K3A mutant<br>(L234K/C243A/F310K/C321A/C356A) | 3IR2             | X-ray<br>(2.25Å)                    | 1.86                                            | 35          |
| hA3G-CTD (191-380) 2K2A mutant<br>(L234K/C243A/F310K/C356A)       | 3V4K             | X-ray<br>(1.38Å)                    | 1.87                                            | 59          |
| hA3C full-length (1-190)                                          | 3VOW             | X-ray<br>(2.15Å)                    | 2.30                                            | 36          |
| hA3G-CTD (197-380)                                                | 3IQS             | X-ray<br>(2.30Å)                    | 2.36                                            | 34          |
| hA3G-CTD (197-380)                                                | 3E1U             | X-ray<br>(2.30Å)                    | 2.41                                            | 34          |
| hA3G-CTD (191-384) 2K3A mutant<br>(L234K/C243A/F310K/C321A/C356A) | 2KEM             | NMR                                 | 3.36                                            | 33          |
| mA2 (46-224) (monomer)                                            | 2RPZ             | NMR                                 | 3.38                                            | unpublished |
| hA2 (41-224) (monomer)                                            | not<br>deposited | CS-Rosetta<br>model                 | 3.35                                            | 37          |
| hA2 (41-224) (tetramer)                                           | 2NYT             | X-ray<br>(2.50Å)                    | 4.31                                            | 60          |
| hA3G-CTD (193-384)                                                | 2KBO             | NMR                                 | 4.37                                            | 32          |
| hA3G-CTD (198-384) 2K3A mutant<br>(L234K/C243A/F310K/C321A/C356A) | 2JYW             | NMR                                 | 4.99                                            | 31          |

<sup>a</sup> final refinement of the X-ray structures.

<sup>b</sup> Pairwise backbone atomic (N, C $\alpha$  and C') r.m.s. differences (excluding loop 3) from the A3A lowest energy structure.

## Supplementary References

59. Li, M. et al. First-in-class small molecule inhibitors of the single-strand DNA cytosine deaminase APOBEC3G. *ACS Chem Biol* **7**, 506-17 (2012).
60. Prochnow, C., Bransteitter, R., Klein, M.G., Goodman, M.F. & Chen, X.S. The APOBEC-2 crystal structure and functional implications for the deaminase AID. *Nature* **445**, 447-51 (2007).
